# Supplementary material for: EEG-Based BCI System Using Adaptive Features Extraction and Classification Procedures
Source: Hindawi journal article supplement (doi:10.1155/2016/4562601), 2016-01-01
Supplement: f1 [file 4562601.f1.pdf]

## Supplementary Materials

TABLE S1: This table shows the detailed sequences of *T*, *U* and *C* for each participant and session. As in TABLE 2 and FIGURE 6, the sequences of the 6<sup>th</sup> session of S02 are not shown because of artifacts in the EEG.

| Participant | S | Sequence                                                                                                                                                                                                                                                                                                |
|-------------|---|---------------------------------------------------------------------------------------------------------------------------------------------------------------------------------------------------------------------------------------------------------------------------------------------------------|
| P01         | 1 | T U <sub>1</sub> U <sub>2</sub> U <sub>3</sub> U <sub>4</sub> U <sub>5</sub> U <sub>6</sub> U <sub>7</sub> U <sub>8</sub> T U <sub>9</sub> U <sub>10</sub> U <sub>11</sub> U <sub>12</sub> U <sub>13</sub> U <sub>14</sub> U <sub>15</sub> U <sub>16</sub>                                              |
|             | 2 | T U <sub>1</sub> U <sub>2</sub> U <sub>3</sub> U <sub>4</sub> U <sub>5</sub> U <sub>6</sub> C <sub>1</sub> C <sub>2</sub> C <sub>3</sub>                                                                                                                                                                |
|             | 3 | T U <sub>1</sub> U <sub>2</sub> U <sub>3</sub> U <sub>4</sub> U <sub>5</sub> U <sub>6</sub> C <sub>1</sub> C <sub>2</sub> C <sub>3</sub>                                                                                                                                                                |
|             | 4 | T U <sub>1</sub> U <sub>2</sub> U <sub>3</sub> U <sub>4</sub> U <sub>5</sub> U <sub>6</sub> C <sub>1</sub> C <sub>2</sub> C <sub>3</sub>                                                                                                                                                                |
|             | 5 | T U <sub>1</sub> U <sub>2</sub> U <sub>3</sub> U <sub>4</sub> U <sub>5</sub> U <sub>6</sub> C <sub>1</sub> C <sub>2</sub> C <sub>3</sub>                                                                                                                                                                |
|             | 6 | T U <sub>1</sub> U <sub>2</sub> U <sub>3</sub> U <sub>4</sub> U <sub>5</sub> U <sub>6</sub> C <sub>1</sub> C <sub>2</sub> C <sub>3</sub>                                                                                                                                                                |
| P02         | 1 | T U <sub>1</sub> U <sub>2</sub> U <sub>3</sub> U <sub>4</sub> U <sub>5</sub> U <sub>6</sub> U <sub>7</sub> U <sub>8</sub> U <sub>9</sub> U <sub>10</sub> U <sub>11</sub> U <sub>12</sub> U <sub>13</sub> U <sub>14</sub> U <sub>15</sub> U <sub>16</sub>                                                |
|             | 2 | T U <sub>1</sub> U <sub>2</sub> U <sub>3</sub> U <sub>4</sub> U <sub>5</sub> U <sub>6</sub> U <sub>7</sub> U <sub>8</sub> U <sub>9</sub> U <sub>10</sub> U <sub>11</sub> U <sub>12</sub> U <sub>13</sub> U <sub>14</sub> U <sub>15</sub> U <sub>16</sub>                                                |
|             | 3 | T U <sub>1</sub> U <sub>2</sub> U <sub>3</sub> U <sub>4</sub> U <sub>5</sub> U <sub>6</sub> T U <sub>7</sub> U <sub>8</sub> U <sub>9</sub> U <sub>10</sub> U <sub>11</sub> U <sub>12</sub> U <sub>13</sub> U <sub>14</sub> U <sub>15</sub> U <sub>16</sub>                                              |
|             | 4 | T U <sub>1</sub> U <sub>2</sub> U <sub>3</sub> U <sub>4</sub> U <sub>5</sub> U <sub>6</sub> U <sub>7</sub> U <sub>8</sub> T U <sub>9</sub> U <sub>10</sub> U <sub>11</sub> U <sub>12</sub> U <sub>13</sub> U <sub>14</sub> U <sub>15</sub> U <sub>16</sub> C <sub>1</sub> C <sub>2</sub> C <sub>3</sub> |
|             | 5 | T U <sub>1</sub> U <sub>2</sub> U <sub>3</sub> U <sub>4</sub> U <sub>5</sub> U <sub>6</sub> C <sub>1</sub> C <sub>2</sub> C <sub>3</sub>                                                                                                                                                                |
| P03         | 1 | T U <sub>1</sub> U <sub>2</sub> U <sub>3</sub> U <sub>4</sub> U <sub>5</sub> U <sub>6</sub> U <sub>7</sub> U <sub>8</sub> U <sub>9</sub> U <sub>10</sub> U <sub>11</sub> U <sub>12</sub> U <sub>13</sub> U <sub>14</sub> U <sub>15</sub> U <sub>16</sub> C <sub>1</sub> C <sub>2</sub> C <sub>3</sub>   |
|             | 2 | T U <sub>1</sub> U <sub>2</sub> U <sub>3</sub> U <sub>4</sub> U <sub>5</sub> U <sub>6</sub> C <sub>1</sub> C <sub>2</sub> C <sub>3</sub>                                                                                                                                                                |
|             | 3 | T U <sub>1</sub> U <sub>2</sub> U <sub>3</sub> U <sub>4</sub> U <sub>5</sub> U <sub>6</sub> U <sub>7</sub> U <sub>8</sub> U <sub>9</sub> U <sub>10</sub> U <sub>11</sub> C <sub>1</sub> C <sub>2</sub> C <sub>3</sub>                                                                                   |
|             | 4 | T U <sub>1</sub> U <sub>2</sub> U <sub>3</sub> U <sub>4</sub> U <sub>5</sub> U <sub>6</sub> C <sub>1</sub> C <sub>2</sub> C <sub>3</sub>                                                                                                                                                                |
|             | 5 | T U <sub>1</sub> U <sub>2</sub> U <sub>3</sub> U <sub>4</sub> U <sub>5</sub> U <sub>6</sub> C <sub>1</sub> C <sub>2</sub> C <sub>3</sub>                                                                                                                                                                |
|             | 6 | T U <sub>1</sub> U <sub>2</sub> U <sub>3</sub> U <sub>4</sub> U <sub>5</sub> U <sub>6</sub> C <sub>1</sub> C <sub>2</sub> C <sub>3</sub>                                                                                                                                                                |
| P04         | 1 | T U <sub>1</sub> U <sub>2</sub> U <sub>3</sub> T U <sub>4</sub> U <sub>5</sub> U <sub>6</sub> U <sub>7</sub> U <sub>8</sub> U <sub>9</sub> U <sub>10</sub> U <sub>11</sub> U <sub>12</sub> U <sub>13</sub> U <sub>14</sub> U <sub>15</sub> U <sub>16</sub>                                              |
|             | 2 | T U <sub>1</sub> U <sub>2</sub> U <sub>3</sub> U <sub>4</sub> U <sub>5</sub> U <sub>6</sub> C <sub>1</sub> C <sub>2</sub> C <sub>3</sub>                                                                                                                                                                |
|             | 3 | T U <sub>1</sub> U <sub>2</sub> U <sub>3</sub> U <sub>4</sub> U <sub>5</sub> U <sub>6</sub> U <sub>7</sub> U <sub>8</sub> U <sub>9</sub> C <sub>1</sub> C <sub>2</sub> C <sub>3</sub>                                                                                                                   |
|             | 4 | T U <sub>1</sub> U <sub>2</sub> U <sub>3</sub> U <sub>4</sub> U <sub>5</sub> U <sub>6</sub> U <sub>7</sub> U <sub>8</sub> U <sub>9</sub> U <sub>10</sub> U <sub>11</sub> U <sub>12</sub> U <sub>13</sub> U <sub>14</sub> U <sub>15</sub> U <sub>16</sub>                                                |
|             | 5 | T U <sub>1</sub> U <sub>2</sub> U <sub>3</sub> U <sub>4</sub> U <sub>5</sub> U <sub>6</sub> U <sub>7</sub> U <sub>8</sub> U <sub>9</sub> U <sub>10</sub> U <sub>11</sub> U <sub>12</sub> U <sub>13</sub> U <sub>14</sub> U <sub>15</sub> U <sub>16</sub>                                                |
|             | 6 | T U <sub>1</sub> U <sub>2</sub> U <sub>3</sub> U <sub>4</sub> U <sub>5</sub> U <sub>6</sub> U <sub>7</sub> U <sub>8</sub> U <sub>9</sub> U <sub>10</sub> U <sub>11</sub> U <sub>12</sub> U <sub>13</sub> U <sub>14</sub> U <sub>15</sub> U <sub>16</sub>                                                |
| P05         | 1 | T U <sub>1</sub> U <sub>2</sub> U <sub>3</sub> U <sub>4</sub> U <sub>5</sub> U <sub>6</sub> U <sub>7</sub> U <sub>8</sub> U <sub>9</sub> U <sub>10</sub> U <sub>11</sub> U <sub>12</sub> U <sub>13</sub> U <sub>14</sub> U <sub>15</sub> U <sub>16</sub> C <sub>1</sub> C <sub>2</sub> C <sub>3</sub>   |
|             | 2 | T U <sub>1</sub> U <sub>2</sub> U <sub>3</sub> U <sub>4</sub> U <sub>5</sub> U <sub>6</sub> C <sub>1</sub> C <sub>2</sub> C <sub>3</sub>                                                                                                                                                                |
|             | 3 | T U <sub>1</sub> U <sub>2</sub> U <sub>3</sub> T U <sub>4</sub> U <sub>5</sub> U <sub>6</sub> U <sub>7</sub> U <sub>8</sub> U <sub>9</sub> U <sub>10</sub> U <sub>11</sub> U <sub>12</sub> U <sub>13</sub> U <sub>14</sub> U <sub>15</sub> U <sub>16</sub> C <sub>1</sub> C <sub>2</sub> C <sub>3</sub> |
|             | 4 | T U <sub>1</sub> U <sub>2</sub> U <sub>3</sub> U <sub>4</sub> U <sub>5</sub> U <sub>6</sub> U <sub>7</sub> U <sub>8</sub> U <sub>9</sub> U <sub>10</sub> U <sub>11</sub> U <sub>12</sub> U <sub>13</sub> U <sub>14</sub> U <sub>15</sub> U <sub>16</sub>                                                |
|             | 5 | T U <sub>1</sub> U <sub>2</sub> U <sub>3</sub> U <sub>4</sub> U <sub>5</sub> U <sub>6</sub> U <sub>7</sub> U <sub>8</sub> U <sub>9</sub> U <sub>10</sub> U <sub>11</sub> U <sub>12</sub> U <sub>13</sub> C <sub>1</sub> C <sub>2</sub> C <sub>3</sub>                                                   |
|             | 6 | T U <sub>1</sub> U <sub>2</sub> U <sub>3</sub> U <sub>4</sub> U <sub>5</sub> U <sub>6</sub> C <sub>1</sub> C <sub>2</sub> C <sub>3</sub>                                                                                                                                                                |
| P06         | 1 | T U <sub>1</sub> U <sub>2</sub> U <sub>3</sub> U <sub>4</sub> U <sub>5</sub> U <sub>6</sub> U <sub>7</sub> U <sub>8</sub> U <sub>9</sub> U <sub>10</sub> U <sub>11</sub> U <sub>12</sub> U <sub>13</sub> U <sub>14</sub> U <sub>15</sub> U <sub>16</sub>                                                |
|             | 2 | T U <sub>1</sub> U <sub>2</sub> U <sub>3</sub> U <sub>4</sub> U <sub>5</sub> U <sub>6</sub> U <sub>7</sub> U <sub>8</sub> U <sub>9</sub> U <sub>10</sub> U <sub>11</sub> U <sub>12</sub> U <sub>13</sub> U <sub>14</sub> U <sub>15</sub> U <sub>16</sub>                                                |
|             | 3 | T U <sub>1</sub> U <sub>2</sub> U <sub>3</sub> U <sub>4</sub> U <sub>5</sub> U <sub>6</sub> U <sub>7</sub> U <sub>8</sub> U <sub>9</sub> U <sub>10</sub> U <sub>11</sub> U <sub>12</sub> U <sub>13</sub> U <sub>14</sub> U <sub>15</sub> U <sub>16</sub> C <sub>1</sub> C <sub>2</sub> C <sub>3</sub>   |
|             | 4 | T U <sub>1</sub> U <sub>2</sub> U <sub>3</sub> U <sub>4</sub> U <sub>5</sub> U <sub>6</sub> C <sub>1</sub> C <sub>2</sub> C <sub>3</sub>                                                                                                                                                                |
|             | 5 | T U <sub>1</sub> U <sub>2</sub> U <sub>3</sub> U <sub>4</sub> U <sub>5</sub> U <sub>6</sub> U <sub>7</sub> U <sub>8</sub> U <sub>9</sub> U <sub>10</sub> U <sub>11</sub> U <sub>12</sub> U <sub>13</sub> U <sub>14</sub> U <sub>15</sub> U <sub>16</sub>                                                |
|             | 6 | T U <sub>1</sub> U <sub>2</sub> U <sub>3</sub> U <sub>4</sub> U <sub>5</sub> U <sub>6</sub> U <sub>7</sub> U <sub>8</sub> U <sub>9</sub> U <sub>10</sub> U <sub>11</sub> U <sub>12</sub> U <sub>13</sub> U <sub>14</sub> U <sub>15</sub> U <sub>16</sub>                                                |
| P07         | 1 | T U <sub>1</sub> U <sub>2</sub> U <sub>3</sub> U <sub>4</sub> U <sub>5</sub> U <sub>6</sub> U <sub>7</sub> U <sub>8</sub> U <sub>9</sub> U <sub>10</sub> U <sub>11</sub> U <sub>12</sub> U <sub>13</sub> U <sub>14</sub> U <sub>15</sub> U <sub>16</sub>                                                |
|             | 2 | T U <sub>1</sub> U <sub>2</sub> U <sub>3</sub> U <sub>4</sub> U <sub>5</sub> U <sub>6</sub> U <sub>7</sub> U <sub>8</sub> U <sub>9</sub> U <sub>10</sub> U <sub>11</sub> U <sub>12</sub> U <sub>13</sub> U <sub>14</sub> U <sub>15</sub> U <sub>16</sub>                                                |
|             | 3 | T U <sub>1</sub> U <sub>2</sub> U <sub>3</sub> U <sub>4</sub> U <sub>5</sub> U <sub>6</sub> U <sub>7</sub> U <sub>8</sub> U <sub>9</sub> U <sub>10</sub> U <sub>11</sub> U <sub>12</sub> C <sub>1</sub> C <sub>2</sub> C <sub>3</sub>                                                                   |
|             | 4 | T U <sub>1</sub> U <sub>2</sub> U <sub>3</sub> U <sub>4</sub> U <sub>5</sub> U <sub>6</sub> C <sub>1</sub> C <sub>2</sub> C <sub>3</sub>                                                                                                                                                                |
|             | 5 | T U <sub>1</sub> U <sub>2</sub> U <sub>3</sub> U <sub>4</sub> U <sub>5</sub> U <sub>6</sub> U <sub>7</sub> C <sub>1</sub> C <sub>2</sub> C <sub>3</sub>                                                                                                                                                 |
|             | 6 | T U <sub>1</sub> U <sub>2</sub> U <sub>3</sub> U <sub>4</sub> U <sub>5</sub> U <sub>6</sub> C <sub>1</sub> C <sub>2</sub> C <sub>3</sub>                                                                                                                                                                |

|     |   |   |                |                |                |                |                |                |                |                |                |                 |                 |                 |                 |                 |                 |                 |                 |                 |
|-----|---|---|----------------|----------------|----------------|----------------|----------------|----------------|----------------|----------------|----------------|-----------------|-----------------|-----------------|-----------------|-----------------|-----------------|-----------------|-----------------|-----------------|
| P08 | 1 | T | U <sub>1</sub> | U <sub>2</sub> | U <sub>3</sub> | U <sub>4</sub> | U <sub>5</sub> | U <sub>6</sub> | U <sub>7</sub> | U <sub>8</sub> | U <sub>9</sub> | U <sub>10</sub> | U <sub>11</sub> | T               | U <sub>12</sub> | U <sub>13</sub> | U <sub>14</sub> | U <sub>15</sub> | U <sub>16</sub> |                 |
|     | 2 | T | U <sub>1</sub> | U <sub>2</sub> | U <sub>3</sub> | T              | U <sub>4</sub> | U <sub>5</sub> | U <sub>6</sub> | U <sub>7</sub> | U <sub>8</sub> | U <sub>9</sub>  | U <sub>10</sub> | U <sub>11</sub> | T               | U <sub>12</sub> | U <sub>13</sub> | U <sub>14</sub> | U <sub>15</sub> | U <sub>16</sub> |
|     | 3 | T | U <sub>1</sub> | U <sub>2</sub> | U <sub>3</sub> | U <sub>4</sub> | U <sub>5</sub> | U <sub>6</sub> | U <sub>7</sub> | U <sub>8</sub> | T              | U <sub>9</sub>  | U <sub>10</sub> | U <sub>11</sub> | U <sub>12</sub> | U <sub>13</sub> | U <sub>14</sub> | U <sub>15</sub> | U <sub>16</sub> |                 |
|     | 4 | T | U <sub>1</sub> | U <sub>2</sub> | U <sub>3</sub> | U <sub>4</sub> | U <sub>5</sub> | U <sub>6</sub> | U <sub>7</sub> | U <sub>8</sub> | U <sub>9</sub> | U <sub>10</sub> | U <sub>11</sub> | U <sub>12</sub> | U <sub>13</sub> | U <sub>14</sub> | U <sub>15</sub> | U <sub>16</sub> |                 |                 |
|     | 5 | T | U <sub>1</sub> | U <sub>2</sub> | U <sub>3</sub> | U <sub>4</sub> | U <sub>5</sub> | U <sub>6</sub> | U <sub>7</sub> | U <sub>8</sub> | U <sub>9</sub> | U <sub>10</sub> | U <sub>11</sub> | U <sub>12</sub> | U <sub>13</sub> | U <sub>14</sub> | U <sub>15</sub> | U <sub>16</sub> |                 |                 |
|     | 6 | T | U <sub>1</sub> | U <sub>2</sub> | U <sub>3</sub> | U <sub>4</sub> | T              | U <sub>5</sub> | U <sub>6</sub> | U <sub>7</sub> | U <sub>8</sub> | U <sub>9</sub>  | U <sub>10</sub> | U <sub>11</sub> | U <sub>12</sub> | U <sub>13</sub> | U <sub>14</sub> | U <sub>15</sub> | U <sub>16</sub> |                 |
| P09 | 1 | T | U <sub>1</sub> | U <sub>2</sub> | U <sub>3</sub> | U <sub>4</sub> | U <sub>5</sub> | T              | U <sub>6</sub> | U <sub>7</sub> | U <sub>8</sub> | U <sub>9</sub>  | U <sub>10</sub> | U <sub>11</sub> | U <sub>12</sub> | U <sub>13</sub> | U <sub>14</sub> | U <sub>15</sub> | U <sub>16</sub> |                 |
|     | 2 | T | U <sub>1</sub> | U <sub>2</sub> | U <sub>3</sub> | U <sub>4</sub> | U <sub>5</sub> | U <sub>6</sub> | U <sub>7</sub> | U <sub>8</sub> | U <sub>9</sub> | U <sub>10</sub> | U <sub>11</sub> | U <sub>12</sub> | U <sub>13</sub> | U <sub>14</sub> | U <sub>15</sub> | U <sub>16</sub> |                 |                 |
|     | 3 | T | U <sub>1</sub> | U <sub>2</sub> | U <sub>3</sub> | U <sub>4</sub> | U <sub>5</sub> | U <sub>6</sub> | U <sub>7</sub> | U <sub>8</sub> | U <sub>9</sub> | U <sub>10</sub> | U <sub>11</sub> | U <sub>12</sub> | U <sub>13</sub> | U <sub>14</sub> | U <sub>15</sub> | U <sub>16</sub> |                 |                 |
|     | 4 | T | U <sub>1</sub> | U <sub>2</sub> | U <sub>3</sub> | U <sub>4</sub> | U <sub>5</sub> | U <sub>6</sub> | U <sub>7</sub> | U <sub>8</sub> | U <sub>9</sub> | U <sub>10</sub> | U <sub>11</sub> | U <sub>12</sub> | U <sub>13</sub> | U <sub>14</sub> | U <sub>15</sub> | U <sub>16</sub> |                 |                 |
|     | 5 | T | U <sub>1</sub> | U <sub>2</sub> | U <sub>3</sub> | U <sub>4</sub> | U <sub>5</sub> | U <sub>6</sub> | U <sub>7</sub> | U <sub>8</sub> | U <sub>9</sub> | T               | U <sub>10</sub> | U <sub>11</sub> | U <sub>12</sub> | U <sub>13</sub> | U <sub>14</sub> | U <sub>15</sub> | U <sub>16</sub> |                 |
|     | 6 | T | U <sub>1</sub> | U <sub>2</sub> | U <sub>3</sub> | U <sub>4</sub> | U <sub>5</sub> | U <sub>6</sub> | T              | U <sub>7</sub> | U <sub>8</sub> | U <sub>9</sub>  | U <sub>10</sub> | U <sub>11</sub> | U <sub>12</sub> | U <sub>13</sub> | U <sub>14</sub> | U <sub>15</sub> | U <sub>16</sub> |                 |
| P10 | 1 | T | U <sub>1</sub> | U <sub>2</sub> | U <sub>3</sub> | U <sub>4</sub> | U <sub>5</sub> | U <sub>6</sub> | U <sub>7</sub> | U <sub>8</sub> | U <sub>9</sub> | U <sub>10</sub> | U <sub>11</sub> | U <sub>12</sub> | U <sub>13</sub> | U <sub>14</sub> | U <sub>15</sub> | U <sub>16</sub> |                 |                 |
|     | 2 | T | U <sub>1</sub> | U <sub>2</sub> | U <sub>3</sub> | T              | U <sub>4</sub> | U <sub>5</sub> | U <sub>6</sub> | T              | U <sub>7</sub> | U <sub>8</sub>  | U <sub>9</sub>  | U <sub>10</sub> | U <sub>11</sub> | U <sub>12</sub> | U <sub>13</sub> | U <sub>14</sub> | U <sub>15</sub> | U <sub>16</sub> |
|     | 3 | T | U <sub>1</sub> | U <sub>2</sub> | U <sub>3</sub> | U <sub>4</sub> | U <sub>5</sub> | U <sub>6</sub> | U <sub>7</sub> | U <sub>8</sub> | U <sub>9</sub> | U <sub>10</sub> | U <sub>11</sub> | U <sub>12</sub> | U <sub>13</sub> | U <sub>14</sub> | U <sub>15</sub> | U <sub>16</sub> |                 |                 |
|     | 4 | T | U <sub>1</sub> | U <sub>2</sub> | U <sub>3</sub> | U <sub>4</sub> | T              | U <sub>5</sub> | U <sub>6</sub> | U <sub>7</sub> | U <sub>8</sub> | U <sub>9</sub>  | U <sub>10</sub> | U <sub>11</sub> | U <sub>12</sub> | U <sub>13</sub> | U <sub>14</sub> | U <sub>15</sub> | U <sub>16</sub> |                 |
|     | 5 | T | U <sub>1</sub> | U <sub>2</sub> | U <sub>3</sub> | U <sub>4</sub> | T              | U <sub>5</sub> | U <sub>6</sub> | U <sub>7</sub> | U <sub>8</sub> | T               | U <sub>9</sub>  | U <sub>10</sub> | U <sub>11</sub> | U <sub>12</sub> | U <sub>13</sub> | U <sub>14</sub> | U <sub>15</sub> | U <sub>16</sub> |
|     | 6 | T | U <sub>1</sub> | U <sub>2</sub> | U <sub>3</sub> | U <sub>4</sub> | U <sub>5</sub> | U <sub>6</sub> | U <sub>7</sub> | U <sub>8</sub> | U <sub>9</sub> | U <sub>10</sub> | U <sub>11</sub> | U <sub>12</sub> | U <sub>13</sub> | U <sub>14</sub> | U <sub>15</sub> | U <sub>16</sub> |                 |                 |
